# Supplementary material for: A Candidate Gene Approach Identifies the CHRNA5-A3-B4 Region as a Risk Factor for Age-Dependent Nicotine Addiction
Source: PubMed Central journal article supplement (PMC2442220; doi:10.1371/journal.pgen.1000125), 2008-07-11
Supplement: pgen.1000125.s001.pdf [file pgen.1000125.s001.pdf]

**Table S1.** Demographics and smoking history by cohort.

| Variable                       | Cohort            |                 |                 | <i>p</i> -value |
|--------------------------------|-------------------|-----------------|-----------------|-----------------|
|                                | LHS<br>(N = 1943) | UT<br>(N = 486) | WI<br>(N = 398) |                 |
| Age (years)                    | 48.5 (6.8)        | 59.3 (10.5)     | 42.7 (10.6)     | <0.001          |
| Sex (% female)                 | 38%               | 42%             | 55%             | <0.001          |
| Onset of daily smoking (years) | 17.4 (3.9)        | 18.0 (4.9)      | 16.2 (3.5)      | <0.001          |
| Daily smoking by age 16 (%)    | 44%               | 39%             | 62%             | <0.001          |
| Cigarettes per day             | 29.5 (13.9)       | 27.7 (15.6)     | 23.0 (9.2)      | <0.001          |
| FTND score                     | 5.8 (2.2)         | 5.6 (2.3)       | 5.6 (2.1)       | <0.001          |
| FTND46 (% low)                 | 32%               | 37%             | 37%             | 0.28            |

For quantitative variables, means and SDs (in parentheses) are shown with, and *p*-values are from ANOVAs. For categorical variables, percentages are shown and *p*-values are from chi-square tests. The FTND46 dichotomy was derived from FTND scores of 0-4 assigned to the low dependence condition and scores of 6-10 assigned to the high dependence condition with scores = 5 omitted.
