# Supplementary material for: A Candidate Gene Approach Identifies the CHRNA5-A3-B4 Region as a Risk Factor for Age-Dependent Nicotine Addiction
Source: PubMed Central journal article supplement (PMC2442220; doi:10.1371/journal.pgen.1000125), 2008-07-11
Supplement: pgen.1000125.s002.pdf [file pgen.1000125.s002.pdf]

**Table S2.** Single Nucleotide Polymorphism discovery by genomic resequencing in seven  $\alpha$ -like nAChR subunits ( $\alpha 2$ ,  $\alpha 3$ ,  $\alpha 4$ ,  $\alpha 5$ ,  $\alpha 6$ ,  $\alpha 9$ , and  $\alpha 10$ ) and three  $\beta$ -like nAChR subunits ( $\beta 2$ ,  $\beta 3$ , and  $\beta 4$ ). Resequencing was performed on 192 individuals of Northern European descent. The individuals were chosen based on a high (n=72) and low (n=72) dependence scale and nonsmokers (n=48). Chromosomal positions ('Position') are based on the NCBI Human Genome Build 35 (May 2004). 'Imp.' designates annotation of SNP location, and 'Major' – 'Minor' allele assignments are based on the forward strand of the chromosome. Linkage disequilibrium groups ('LD Group') were determined using the ldSelect algorithm [68] at a threshold  $r^2$  value of 0.64 on the 192 individuals across a gene or gene group (based on close proximity) and assigned a unique number. Genes are ordered by ascending chromosome number. The *P*-values are Fisher exact allele tests of high vs. low nicotine dependence with minor allele frequencies shown for these groups. The 'Genotyped' column indicates polymorphisms typed on the larger cohort.

| Gene:<br>Chromosome | Position  | Imp.     | Major | Minor | LD Group | Freq.<br>High | Freq.<br>Low | P value | refSNP ID  | Genotyped |
|---------------------|-----------|----------|-------|-------|----------|---------------|--------------|---------|------------|-----------|
| <b>CHRNA2:</b>      |           |          |       |       |          |               |              |         |            |           |
| <b>Chr 1</b>        | 151353472 | UTR      | C     | A     |          | 0.01          | 0.01         | -       | rs56205574 |           |
|                     | 151353541 | UTR      | C     | T     | 2        | 0.11          | 0.10         | 0.84    | rs2280781  | +         |
|                     | 151354912 | intronic | A     | T     |          | 0.04          | 0.02         | 0.45    | rs8192484  |           |
|                     | 151355288 | intronic | G     | A     |          | 0.01          | 0.01         | -       | rs55698310 |           |
|                     | 151357563 | non      | G     | C     |          | 0.01          | 0.01         | -       | rs55685423 |           |
|                     | 151357605 | synon    | G     | A     |          | 0.01          | 0.01         | -       | rs55857552 |           |
|                     | 151357724 | intronic | G     | T     | 2        | 0.12          | 0.07         | 0.21    | rs4845378  |           |
|                     | 151357735 | intronic | G     | A     |          | 0.01          | 0.01         | -       | rs56146528 |           |
|                     | 151361594 | UTR      | C     | G     |          | 0.07          | 0.09         | 0.67    | rs2072659  | +         |
|                     | 151361794 | UTR      | C     | T     | 1        | 0.30          | 0.20         | 0.07    | rs2072660  | +         |
|                     | 151361953 | UTR      | G     | A     | 2        | 0.30          | 0.22         | 0.17    | rs2072661  |           |
|                     | 151362019 | UTR      | C     | T     | 3        | 0.06          | 0.08         | 0.49    | rs4292956  | +         |

| Gene:<br>Chromosome      | Position  | Imp.     | Major | Minor | LD Group | Freq.<br>High | Freq.<br>Low | P value | refSNP ID  | Genotyped |
|--------------------------|-----------|----------|-------|-------|----------|---------------|--------------|---------|------------|-----------|
| <b>CHRNA9:<br/>Chr 4</b> | 151362065 | UTR      | C     | T     | 3        | 0.06          | 0.06         | 1.00    | rs45490696 |           |
|                          | 40178152  | flank    | C     | A     | 4        | 0.30          | 0.28         | 0.89    | rs372211   |           |
|                          | 40178176  | flank    | A     | T     | 4        | 0.30          | 0.28         | 0.79    | rs4469116  | +         |
|                          | 40178236  | flank    | A     | T     | 4        | 0.30          | 0.28         | 0.70    | rs4359945  |           |
|                          | 40178241  | flank    | G     | A     |          | 0.00          | 0.01         | -       | rs55725809 |           |
|                          | 40178244  | flank    | C     | T     |          | 0.01          | 0.03         | 0.68    | rs6544304  |           |
|                          | 40178451  | synon    | C     | T     | 4        | 0.36          | 0.31         | 0.45    | rs56241474 |           |
|                          | 40178494  | intronic | C     | T     |          | 0.21          | 0.25         | 0.48    | rs10015231 |           |
|                          | 40178836  | synon    | C     | T     | 6        | 0.40          | 0.41         | 0.90    | rs10022491 | +         |
|                          | 40178872  | synon    | C     | T     | 4        | 0.31          | 0.28         | 0.70    | rs56159866 |           |
|                          | 40178896  | synon    | G     | A     |          | 0.01          | 0.03         | 0.45    | rs55974552 |           |
|                          | 40178905  | synon    | G     | A     |          | <0.01         | 0.01         | -       | rs56171884 |           |
|                          | 40178934  | intronic | G     | A     |          | <0.01         | 0.01         | -       | rs56299220 |           |
|                          | 40179007  | intronic | G     | A     |          | 0.03          | 0.05         | 0.54    | rs55893318 |           |
|                          | 40179152  | intronic | T     | C     |          | <0.01         | <0.01        | 1.00    | rs55947729 |           |
|                          | 40179971  | intronic | -     | A     |          | 0.06          | 0.04         | 0.57    | rs10419703 |           |
|                          | 40180010  | intronic | A     | G     |          | <0.01         | <0.01        | -       | rs55698633 |           |
|                          | 40180065  | intronic | G     | C     |          | 0.06          | 0.04         | 0.79    | rs6447332  |           |
|                          | 40180178  | synon    | T     | C     |          | 0.01          | 0.01         | -       | rs55998310 |           |
|                          | 40180502  | intronic | G     | A     | 6        | 0.45          | 0.48         | 0.72    | rs6819385  | +         |
|                          | 40191579  | intronic | G     | A     | 4        | 0.36          | 0.33         | 0.69    | rs7669882  | +         |
|                          | 40191591  | intronic | C     | T     | 4        | 0.36          | 0.33         | 0.69    | rs6447450  |           |
|                          | 40191691  | intronic | T     | C     | 6        | 0.43          | 0.51         | 0.16    | rs10029872 |           |
|                          | 40192136  | synon    | G     | A     |          | <0.01         | 0.01         | -       | rs55665751 |           |
|                          | 40192176  | non      | T     | C     |          | 0.01          | <0.01        | -       | rs56205779 |           |
|                          | 40192387  | intronic | C     | A     |          | 0.01          | <0.01        | -       | rs55660233 |           |
|                          | 40192468  | intronic | T     | A     |          | 0.03          | 0.02         | 1.00    | rs56078044 |           |
|                          | 40196666  | intronic | T     | -     | 5        | 0.16          | 0.13         | 0.51    | rs55692533 |           |
|                          | 40196731  | intronic | C     | A     | 5        | 0.16          | 0.13         | 0.51    | rs56012618 |           |
|                          | 40196743  | intronic | A     | G     | 5        | 0.19          | 0.19         | 1.00    | rs4861323  |           |
|                          | 40196959  | non      | G     | A     |          | 0.01          | <0.01        | -       | rs56210055 |           |
|                          | 40196969  | non      | C     | T     | 5        | 0.17          | 0.14         | 0.52    | rs55633891 |           |
|                          | 40197161  | non      | A     | G     |          | <0.01         | <0.01        | -       | rs56098158 |           |
|                          | 40197220  | non      | C     | T     |          | 0.01          | <0.01        | -       | rs55962300 |           |
|                          | 40197350  | non      | G     | A     | 5        | 0.20          | 0.19         | 0.88    | rs10009228 |           |
|                          | 40197642  | UTR      | T     | A     |          | 0.03          | 0.06         | 0.38    | rs4861327  |           |
|                          | 40197708  | UTR      | G     | A     | 4        | 0.31          | 0.27         | 0.52    | rs6819816  |           |

| Gene:<br>Chromosome      | Position                | Imp.     | Major    | Minor | LD Group | Freq.<br>High | Freq.<br>Low | P value | refSNP ID  | Genotyped  |   |
|--------------------------|-------------------------|----------|----------|-------|----------|---------------|--------------|---------|------------|------------|---|
| <b>CHRNA2:<br/>Chr 8</b> | 40197827                | UTR      | C        | T     |          | 0.05          | 0.04         | 0.78    | rs56291234 |            |   |
|                          | 27374308                | UTR      | C        | T     | 10       | 0.44          | 0.45         | 0.88    | rs2292974  |            |   |
|                          | 27374342                | UTR      | C        | A     | 10       | 0.41          | 0.45         | 0.56    | rs2292975  | +          |   |
|                          | 27374461                | UTR      | G        | A     | 7        | 0.15          | 0.20         | 0.34    | rs2292976  |            |   |
|                          | 27374552                | UTR      | G        | C     | 7        | 0.14          | 0.20         | 0.34    | rs2292977  |            |   |
|                          | 27375209                | intronic | A        | G     |          | 0.27          | 0.29         | 0.87    | rs735421   | +          |   |
|                          | 27376443                | non      | G        | T     |          | <0.01         | 0.01         | -       | rs56344740 |            |   |
|                          | 27376553                | synon    | G        | A     |          | 0.03          | 0.01         | 0.45    | rs56298562 |            |   |
|                          | 27376814                | non      | G        | C     |          | <0.01         | 0.01         | -       | rs56339365 |            |   |
|                          | 27376892                | non      | C        | T     |          | <0.01         | <0.01        | -       | rs56371471 |            |   |
|                          | 27377043                | synon    | G        | A     |          | <0.01         | 0.01         | -       | rs56189058 |            |   |
|                          | 27377106                | synon    | G        | A     |          | 0.02          | 0.01         | 0.62    | rs56229264 |            |   |
|                          | 27380739                | non      | T        | C     | 9        | 0.48          | 0.48         | 1.00    | rs891398   | +          |   |
|                          | 27380761                | synon    | G        | A     | 7        | 0.13          | 0.13         | 1.00    | rs2565061  | +          |   |
|                          | 27380841                | intronic | C        | T     |          | 0.00          | 0.01         | 1.00    | rs55698463 |            |   |
|                          | 27381108                | intronic | G        | T     | 7        | 0.14          | 0.15         | 0.87    | rs2099166  |            |   |
|                          | 27382758                | intronic | GG       | -     | 9        | 0.47          | 0.46         | 1.00    | rs3832545  |            |   |
|                          | 27384184                | intronic | C        | T     | 7        | 0.11          | 0.12         | 1.00    | rs2565066  |            |   |
|                          | 27384271                | intronic | C        | G     |          | 0.33          | 0.28         | 0.37    | rs2472554  | +          |   |
|                          | 27384326                | intronic | G        | A     |          | 0.01          | 0.01         | -       | rs55965307 |            |   |
|                          | 27384428                | non      | G        | A     | 7        | 0.13          | 0.13         | 1.00    | rs2472553  | +          |   |
|                          | 27384537                | UTR      | G        | T     | 8        | 0.01          | 0.00         | -       | rs12114756 |            |   |
|                          | 27384705                | intronic | C        | A     |          | <0.01         | 0.01         | -       | rs55954528 |            |   |
|                          | 27392419                | UTR      | G        | T     | 8        | 0.01          | <0.01        | -       | rs55934039 |            |   |
|                          | 27392545                | UTR      | G        | A     |          | <0.01         | 0.02         | 0.11    | rs55726427 |            |   |
|                          | 27392664                | UTR      | C        | T     |          | <0.01         | 0.01         | -       | rs56032736 |            |   |
|                          | 27392684                | flank    | A        | T     | 8        | 0.01          | <0.01        | -       | rs2565060  |            |   |
|                          | 27392699                | flank    | T        | C     | 8        | 0.01          | <0.01        | -       | rs34206731 |            |   |
|                          | 27392703                | flank    | C        | T     | 8        | 0.01          | <0.01        | -       | rs56278204 |            |   |
|                          | <b>CHRN3:<br/>Chr 8</b> | 42671628 | flank    | G     | T        |               | <0.01        | 0.01    | -          | rs56279199 |   |
|                          |                         | 42671687 | flank    | G     | C        |               | 0.01         | 0.01    | -          | rs41272375 |   |
|                          |                         | 42671790 | UTR      | A     | G        |               | 0.19         | 0.25    | 0.31       | rs4950     | + |
|                          |                         | 42672020 | intronic | A     | T        |               | 0.01         | 0.02    | 0.36       | rs55920715 |   |
|                          |                         | 42683143 | non      | T     | G        |               | <0.01        | 0.01    | -          | rs56357313 |   |
| 42684671                 |                         | intronic | T        | -     |          | <0.01         | 0.01         | -       | rs55786845 |            |   |
| 42704851                 |                         | intronic | T        | C     | 12       | 0.08          | 0.05         | 0.47    | rs55817013 |            |   |

| Gene:<br>Chromosome        | Position | Imp.       | Major | Minor | LD Group | Freq.<br>High | Freq.<br>Low | P value    | refSNP ID  | Genotyped |
|----------------------------|----------|------------|-------|-------|----------|---------------|--------------|------------|------------|-----------|
| <b>CHRNA6:<br/>Chr 8</b>   | 42706222 | synon      | C     | T     | 12       | 0.06          | 0.04         | 0.57       | rs4952     |           |
|                            | 42706709 | non        | G     | A     |          | 0.01          | 0.01         | -          | rs56198260 |           |
|                            | 42706816 | synon      | G     | C     | 12       | 0.06          | 0.04         | 0.57       | rs4953     | +         |
|                            | 42710763 | intronic   | G     | A     |          | <0.01         | <0.01        | -          | rs55924223 |           |
|                            | 42710995 | UTR        | G     | A     |          | 0.01          | 0.01         | -          | rs56313404 |           |
|                            | 42726938 | flank      | T     | A     | 11       | 0.17          | 0.22         | 0.29       | rs7832639  |           |
|                            | 42726994 | UTR        | G     | A     |          | 0.01          | <0.01        | -          | rs55776131 |           |
|                            | 42727068 | UTR        | T     | C     |          | 0.03          | 0.00         | 0.06       | rs41265262 |           |
|                            | 42727243 | UTR        | C     | T     |          | 0.01          | 0.00         | -          | rs56044754 |           |
|                            | 42727356 | UTR        | G     | C     | 11       | 0.21          | 0.28         | 0.17       | rs2304297  |           |
|                            | 42727538 | non        | C     | T     |          | 0.00          | 0.00         | -          | rs55662044 |           |
|                            | 42727720 | intronic   | G     | A     | 11       | 0.14          | 0.23         | 0.07       | rs7845663  |           |
|                            | 42730880 | stop       | C     | A     |          | <0.01         | 0.01         | -          | rs56315032 |           |
|                            | 42731021 | frameshift | T     | -     |          | 0.01          | <0.01        | -          | rs56229628 |           |
|                            | 42731443 | intronic   | G     | A     | 11       | 0.14          | 0.24         | 0.04       | rs7000412  |           |
|                            | 42731535 | intronic   | C     | A     | 11       | 0.14          | 0.24         | 0.05       | rs7001753  |           |
|                            | 42733291 | intronic   | T     | C     |          | 0.00          | 0.01         | -          | rs55984829 |           |
|                            | 42733535 | intronic   | C     | A     | 11       | 0.16          | 0.25         | 0.08       | rs892413   | +         |
|                            | 42739158 | intronic   | C     | G     | 11       | 0.15          | 0.24         | 0.05       | rs1072003  | +         |
|                            | 42739555 | intronic   | C     | T     |          | 0.01          | <0.01        | -          | rs56238139 |           |
| 42739561                   | intronic | C          | A     |       | 0.01     | 0.03          | 0.21         | rs11985288 |            |           |
| 42742951                   | flank    | ATG        | -     |       | 0.02     | 0.01          | 0.62         | rs56376656 |            |           |
| <b>CHRNA10:<br/>Chr 11</b> | 3643303  | flank      | G     | A     |          | 0.13          | 0.11         | 0.70       | rs56084560 |           |
|                            | 3643385  | flank      | C     | T     | 14       | 0.05          | 0.05         | 1.00       | rs12269960 |           |
|                            | 3643435  | UTR        | C     | G     |          | <0.01         | 0.01         | -          | rs12711988 |           |
|                            | 3643520  | UTR        | C     | G     | 16       | <0.01         | 0.02         | 0.25       | rs12221525 |           |
|                            | 3643625  | UTR        | T     | A     | 14       | 0.06          | 0.06         | 1.00       | rs55798582 |           |
|                            | 3644005  | non        | G     | A     |          | <0.01         | 0.01         | -          | rs2231548  |           |
|                            | 3644050  | non        | A     | G     |          | <0.01         | <0.01        | -          | rs55650071 |           |
|                            | 3644052  | non        | G     | T     |          | 0.01          | <0.01        | -          | rs56054950 |           |
|                            | 3644202  | non        | T     | G     | 14       | 0.06          | 0.06         | 1.00       | rs2231547  |           |
|                            | 3644227  | non        | C     | T     | 14       | 0.06          | 0.06         | 1.00       | rs2231546  |           |
|                            | 3644561  | intronic   | A     | G     | 13       | 0.29          | 0.27         | 0.79       | rs2741862  | +         |
|                            | 3644640  | intronic   | TTTA  | -     |          | 0.01          | <0.01        | 0.50       | rs55839829 |           |
|                            | 3644804  | intronic   | G     | A     | 13       | 0.36          | 0.35         | 0.88       | rs2741861  |           |
|                            | 3644856  | intronic   | G     | C     | 17       | <0.01         | 0.01         | -          | rs56101595 |           |

| Gene:<br>Chromosome       | Position | Imp.            | Major              | Minor | LD Group | Freq.<br>High | Freq.<br>Low | P value | refSNP ID  | Genotyped |
|---------------------------|----------|-----------------|--------------------|-------|----------|---------------|--------------|---------|------------|-----------|
|                           | 3646686  | intronic        | A                  | G     |          | <0.01         | 0.01         | -       | rs55836061 |           |
|                           | 3646697  | intronic        | G                  | A     |          | 0.01          | <0.01        | -       | rs55933520 |           |
|                           | 3646759  | intronic        | G                  | A     | 13       | 0.01          | <0.01        | -       | rs2741868  | +         |
|                           | 3646854  | intronic        | T                  | C     | 13       | 0.35          | 0.36         | 0.80    | rs2672211  |           |
|                           | 3647134  | non             | G                  | T     | 15       | 0.04          | 0.02         | 0.50    | rs55719530 |           |
|                           | 3647174  | <u>intronic</u> | T                  | A     | 15       | 0.04          | 0.02         | 0.50    | rs56167171 |           |
|                           | 3647338  | <u>intronic</u> | CT                 | -     |          | 0.18          | 0.15         | 0.63    | rs3996926  |           |
|                           | 3647347  | <u>intronic</u> | A                  | -     | 17       | <0.01         | 0.01         | 1.00    | rs55794740 |           |
|                           | 3647439  | <u>intronic</u> | A                  | C     |          | 0.01          | 0.04         | 0.45    | rs11028916 |           |
|                           | 3647450  | <u>intronic</u> | 14nts <sup>1</sup> | -     |          | <0.01         | <0.01        | -       | rs56081677 |           |
|                           | 3647789  | <u>intronic</u> | T                  | A     |          | <0.01         | 0.01         | -       | rs55716405 |           |
|                           | 3647913  | <u>intronic</u> | G                  | C     |          | <0.01         | <0.01        | -       | rs55966314 |           |
|                           | 3647993  | <u>intronic</u> | C                  | T     |          | 0.18          | 0.12         | 0.23    | rs2672213  | +         |
|                           | 3648013  | <u>intronic</u> | T                  | G     | 18       | <0.01         | <0.01        | -       | rs16942496 |           |
|                           | 3648088  | intronic        | T                  | C     | 13       | 0.33          | 0.34         | 0.90    | rs2672214  |           |
|                           | 3649205  | flank           | A                  | G     | 18       | <0.01         | 0.01         | -       | rs55982775 |           |
|                           | 3649219  | flank           | G                  | T     | 16       | <0.01         | 0.03         | 0.12    | rs2231536  |           |
|                           | 3649354  | flank           | C                  | G     |          | <0.01         | 0.01         | -       | rs55886645 |           |
| <b>CHRNA5:<br/>Chr 15</b> |          |                 |                    |       |          |               |              |         |            |           |
|                           | 76644934 | flank           | G                  | A     |          | <0.01         | 0.01         | -       | rs56182392 |           |
|                           | 76644951 | flank           | T                  | A     | 21       | 0.22          | 0.22         | 1.00    | rs503464   |           |
|                           | 76644994 | UTR             | T                  | G     | 20       | 0.49          | 0.38         | 0.10    | rs55853698 |           |
|                           | 76645041 | UTR             | C                  | G     | 20       | 0.49          | 0.38         | 0.11    | rs55781567 |           |
|                           | 76651079 | intronic        | C                  | T     |          | 0.02          | 0.02         | 1.00    | rs56219480 |           |
|                           | 76651199 | intronic        | G                  | A     |          | <0.01         | <0.01        | -       | rs55758640 |           |
|                           | 76660174 | intronic        | C                  | T     | 21       | 0.18          | 0.22         | 0.45    | rs569207   | +         |
|                           | 76660327 | non             | T                  | G     |          | <0.01         | <0.01        | -       | rs56351164 |           |
|                           | 76665596 | intronic        | G                  | A     | 20       | 0.53          | 0.32         | 0.002   | rs951266   |           |
|                           | 76665620 | intronic        | C                  | T     |          | <0.01         | 0.02         | 0.20    | rs56160480 |           |
|                           | 76665737 | intronic        | A                  | G     |          | 0.01          | <0.01        | -       | rs56211565 |           |
|                           | 76666023 | intronic        | A                  | C     |          | <0.01         | 0.01         | -       | rs56257539 |           |
|                           | 76666113 | intronic        | C                  | T     |          | 0.01          | 0.01         | -       | rs55982512 |           |
|                           | 76666297 | intronic        | A                  | G     | 19       | 0.31          | 0.45         | 0.03    | rs555018   | +         |
|                           | 76667536 | intronic        | C                  | T     | 19       | 0.31          | 0.35         | 0.60    | rs647041   |           |
|                           | 76667632 | intronic        | G                  | C     | 22       | 0.05          | 0.06         | 0.60    | rs12898919 |           |
|                           | 76667748 | non             | A                  | G     | 24       | 0.01          | 0.00         | -       | rs56023835 |           |
|                           | 76667807 | non             | G                  | A     |          | 0.04          | 0.02         | 0.45    | rs2229961  | +         |

<sup>1</sup> Major Allele: TCAGTACCCAACAG

| Gene:<br>Chromosome       | Position | Imp.     | Major              | Minor | LD Group | Freq.<br>High | Freq.<br>Low | P value   | refSNP ID  | Genotyped |
|---------------------------|----------|----------|--------------------|-------|----------|---------------|--------------|-----------|------------|-----------|
| <b>CHRNA3:<br/>Chr 15</b> | 76668142 | intronic | G                  | A     | 22       | 0.06          | 0.07         | 0.79      | rs12903575 | +         |
|                           | 76669007 | intronic | T                  | C     |          | <0.01         | <0.01        | -         | rs56186290 |           |
|                           | 76669059 | intronic | C                  | T     |          | 0.01          | <0.01        | -         | rs56201623 |           |
|                           | 76669159 | intronic | T                  | C     |          | 0.01          | 0.01         | -         | rs56134824 |           |
|                           | 76669276 | non      | C                  | T     |          | 0.00          | 0.01         | -         | rs55863434 |           |
|                           | 76669980 | non      | G                  | A     | 20       | 0.50          | 0.34         | 0.008     | rs16969968 | +         |
|                           | 76673043 | UTR      | C                  | T     | 19       | 0.28          | 0.38         | 0.09      | rs615470   |           |
|                           | 76673204 | UTR      | G                  | A     |          | <0.01         | <0.01        | -         | rs8192483  |           |
|                           | 76673213 | UTR      | G                  | A     |          | <0.01         | 0.02         | 0.22      | rs55783657 |           |
|                           | 76673253 | UTR      | C                  | T     | 20       | 0.51          | 0.32         | 0.003     | rs8192482  |           |
|                           | 76673282 | UTR      | A                  | G     | 21       | 0.20          | 0.27         | 0.24      | rs564585   |           |
|                           | 76673903 | flank    | G                  | A     |          | <0.01         | 0.01         | -         | rs55989223 |           |
|                           | 76673947 | flank    | C                  | T     |          | <0.01         | 0.01         | -         | rs56255741 |           |
|                           | 76674002 | flank    | G                  | A     | 20       | 0.49          | 0.34         | 0.01      | rs4887067  |           |
|                           | 76674415 | flank    | A                  | C     |          | 0.01          | <0.01        | -         | rs55919839 |           |
|                           | 76674493 | flank    | T                  | G     | 22       | 0.04          | 0.06         | 0.44      | rs12899226 |           |
|                           | 76674550 | flank    | G                  | A     |          | <0.01         | 0.01         | -         | rs55736590 |           |
|                           | 76674770 | UTR      | TCTC               | -     | 19       | 0.29          | 0.38         | 0.13      | rs56297775 |           |
|                           | 76674887 | UTR      | G                  | A     | 19       | 0.29          | 0.38         | 0.13      | rs660652   |           |
|                           | 76675049 | UTR      | G                  | A     | 19       | 0.29          | 0.38         | 0.13      | rs472054   |           |
|                           | 76675098 | UTR      | 13nts <sup>2</sup> | -     |          | <0.01         | <0.01        | -         | rs55948826 |           |
|                           | 76675213 | UTR      | G                  | A     |          | <0.01         | 0.01         | -         | rs56148181 |           |
|                           | 76675293 | UTR      | 3(C)               | 7(C)  | 21       | 0.1           | 0.2          | 0.60      | rs10637216 |           |
|                           | 76675406 | UTR      | G                  | A     |          | 0.01          | 0.01         | 1.00      | rs56113144 |           |
|                           | 76675455 | UTR      | G                  | A     |          | 0.21          | 0.26         | 0.40      | rs578776   | +         |
|                           | 76675568 | UTR      | 10nts <sup>3</sup> | -     |          | <0.01         | 0.01         | -         | rs55820134 |           |
|                           | 76675663 | UTR      | A                  | G     | 24       | 0.01          | <0.01        | -         | rs56256191 |           |
|                           | 76680842 | synon    | G                  | A     |          | 0.01          | 0.01         | -         | rs56403513 |           |
|                           | 76680914 | synon    | G                  | A     |          | 0.01          | <0.01        | -         | rs56179957 |           |
|                           | 76681338 | non      | G                  | A     |          | 0.01          | <0.01        | -         | rs56371320 |           |
|                           | 76681394 | synon    | G                  | A     | 20       | 0.49          | 0.36         | 0.02      | rs1051730  | +         |
|                           | 76681412 | synon    | G                  | T     |          | 0.01          | 0.01         | -         | rs55958820 |           |
| 76681475                  | synon    | A        | G                  |       | 0.01     | 0.01          | -            | rs8192480 |            |           |
| 76696453                  | synon    | C        | T                  |       | 0.06     | 0.01          | 0.10         | rs8192479 |            |           |
| 76696507                  | synon    | C        | T                  | 19    | 0.28     | 0.37          | 0.13         | rs3743075 |            |           |

<sup>2</sup> Major Allele: ATGCTGTGGTCCA

<sup>3</sup> Major Allele: TAGGGTAACG

| Gene:<br>Chromosome       | Position | Imp.     | Major             | Minor | LD Group | Freq.<br>High | Freq.<br>Low | P value    | refSNP ID  | Genotyped |
|---------------------------|----------|----------|-------------------|-------|----------|---------------|--------------|------------|------------|-----------|
| <b>CHRNA4:<br/>Chr 15</b> | 76696535 | intronic | A                 | G     | 19       | 0.29          | 0.38         | 0.13       | rs3743074  |           |
|                           | 76696594 | intronic | T                 | G     | 19       | 0.29          | 0.38         | 0.13       | rs3743073  |           |
|                           | 76696612 | intronic | G                 | A     |          | 0.01          | <0.01        | -          | rs41280050 |           |
|                           | 76698094 | intronic | -                 | A     | 22       | 0.03          | 0.06         | 0.41       | rs34844435 |           |
|                           | 76698135 | intronic | G                 | A     |          | <0.01         | 0.01         | -          | rs56409843 |           |
|                           | 76698236 | synon    | T                 | C     | 20       | 0.54          | 0.42         | 0.03       | rs8040868  |           |
|                           | 76698285 | non      | C                 | T     | 22       | 0.04          | 0.06         | 0.59       | rs8192475  | +         |
|                           | 76700428 | flank    | VNTR <sup>4</sup> |       |          |               |              |            | rs55787222 |           |
|                           | 76703677 | flank    | G                 | C     | 19       | 0.29          | 0.39         | 0.08       | rs2904130  |           |
|                           | 76704371 | UTR      | C                 | T     |          | 0.02          | 0.01         | 0.67       | rs55952530 |           |
|                           | 76704454 | UTR      | G                 | A     | 19       | 0.27          | 0.38         | 0.05       | rs1948     |           |
|                           | 76708372 | non      | C                 | A     |          | <0.01         | <0.01        | -          | rs56258098 |           |
|                           | 76708398 | non      | G                 | A     |          | 0.01          | <0.01        | -          | rs56317523 | +         |
|                           | 76708657 | non      | G                 | A     |          | 0.01          | 0.01         | -          | rs56235003 |           |
|                           | 76708817 | synon    | G                 | A     | 23       | 0.01          | 0.01         | -          | rs3743072  |           |
|                           | 76708862 | synon    | G                 | A     |          | 0.00          | 0.01         | -          | rs55859769 |           |
|                           | 76709249 | synon    | G                 | A     |          | 0.05          | 0.04         | 1.00       | rs55919125 |           |
|                           | 76709284 | non      | T                 | C     | 23       | <0.01         | 0.01         | -          | rs56218866 | +         |
|                           | 76709288 | synon    | G                 | A     |          | 0.01          | <0.01        | -          | rs55851389 |           |
|                           | 76709295 | non      | C                 | T     |          | 0.01          | 0.02         | 0.62       | rs56095004 | +         |
| 76710560                  | non      | G        | A                 | 22    | 0.04     | 0.07          | 0.29         | rs12914008 |            |           |
| 76710776                  | intronic | C        | G                 |       | 0.01     | <0.01         | -            | rs55647022 |            |           |
| 76710900                  | intronic | T        | G                 | 21    | 0.16     | 0.22          | 0.23         | rs28534575 |            |           |
| 76711042                  | intronic | C        | T                 | 20    | 0.48     | 0.28          | 0.001        | rs17487223 |            |           |
| 76713781                  | intronic | C        | G                 | 21    | 0.17     | 0.22          | 0.43         | rs12440014 |            |           |
| 76714644                  | intronic | T        | G                 |       | 0.01     | 0.01          | -            | rs12440298 |            |           |
| 76714827                  | intronic | T        | C                 |       | <0.01    | 0.01          | -            | rs56011563 |            |           |
| 76715319                  | intronic | T        | G                 |       | 0.20     | 0.21          | 1.00         | rs12441088 |            |           |
| <b>CHRNA4:<br/>Chr 20</b> | 61446974 | UTR      | C                 | T     | 26       | 0.06          | 0.06         | 1.00       | rs45476096 | +         |
|                           | 61447364 | UTR      | T                 | C     | 26       | 0.06          | 0.06         | 1.00       | rs41283006 |           |
|                           | 61447445 | UTR      | C                 | T     |          | <0.01         | <0.01        | -          | rs55985535 |           |
|                           | 61447459 | UTR      | C                 | T     | 26       | 0.06          | 0.06         | 1.00       | rs41283008 |           |
|                           | 61447493 | UTR      | G                 | C     | 26       | 0.06          | 0.06         | 1.00       | rs41283010 |           |
|                           | 61447553 | UTR      | C                 | T     |          | 0.01          | 0.01         | -          | rs55715203 |           |

<sup>4</sup> Variable Nucleotide Repeat Frequencies: 4(GGCG) 0.510, 2(GGCG) 0.465, 5(GGCG) 0.025

| Gene:<br>Chromosome | Position | Imp.     | Major | Minor | LD Group | Freq.<br>High | Freq.<br>Low | P value | refSNP ID  | Genotyped |
|---------------------|----------|----------|-------|-------|----------|---------------|--------------|---------|------------|-----------|
|                     | 61447587 | UTR      | C     | T     |          | 0.01          | 0.01         | -       | rs56339657 |           |
|                     | 61447666 | UTR      | G     | A     |          | 0.00          | 0.01         | -       | rs56164905 |           |
|                     | 61447762 | UTR      | G     | T     |          | 0.02          | 0.04         | 0.72    | rs45607838 |           |
|                     | 61447779 | UTR      | A     | G     |          | 0.08          | 0.10         | 0.84    | rs45624232 |           |
|                     | 61447817 | UTR      | G     | A     | 26       | 0.06          | 0.06         | 1.00    | rs45556643 |           |
|                     | 61451397 | intronic | G     | A     |          | <0.01         | 0.01         | -       | rs56160350 |           |
|                     | 61451435 | intronic | T     | C     | 29       | 0.17          | 0.17         | 1.00    | rs3827020  |           |
|                     | 61451438 | intronic | G     | A     |          | 0.10          | 0.05         | 0.24    | rs45442394 |           |
|                     | 61451546 | non      | G     | A     | 31       | <0.01         | 0.01         | -       | rs56000199 |           |
|                     | 61451548 | synon    | T     | C     | 30       | 0.41          | 0.42         | 1.00    | rs1044397  | +         |
|                     | 61451578 | synon    | A     | G     | 30       | 0.41          | 0.41         | 1.00    | rs1044396  | +         |
|                     | 61451759 | non      | C     | T     |          | <0.01         | 0.02         | 0.25    | rs55855125 |           |
|                     | 61451806 | synon    | G     | A     |          | <0.01         | <0.01        | -       | rs45569837 |           |
|                     | 61451855 | non      | G     | A     | 31       | <0.01         | 0.01         | -       | rs55915440 |           |
|                     | 61451980 | synon    | G     | A     | 27       | 0.05          | 0.05         | 1.00    | rs2229960  |           |
|                     | 61451998 | synon    | A     | C     | 28       | 0.13          | 0.10         | 0.55    | rs2229959  |           |
|                     | 61452004 | synon    | C     | G     |          | <0.01         | 0.01         | -       | rs56142348 |           |
|                     | 61452201 | non      | G     | A     |          | 0.01          | <0.01        | -       | rs56175056 |           |
|                     | 61452529 | synon    | G     | A     | 27       | 0.05          | 0.05         | 1.00    | rs1044394  | +         |
|                     | 61452568 | synon    | G     | A     | 28       | 0.13          | 0.10         | 0.43    | rs1044393  | +         |
|                     | 61452846 | intronic | G     | A     | 26       | 0.06          | 0.06         | 1.00    | rs56151028 |           |
|                     | 61452940 | intronic | C     | T     | 28       | 0.14          | 0.11         | 0.70    | rs13041103 |           |
|                     | 61452956 | intronic | C     | T     | 25       | 0.12          | 0.07         | 0.26    | rs55731226 |           |
|                     | 61452958 | intronic | T     | C     |          | 0.04          | 0.02         | 0.50    | rs55786941 |           |
|                     | 61452967 | intronic | C     | -     | 27       | 0.03          | 0.04         | 0.72    | rs55869461 |           |
|                     | 61457989 | intronic | G     | -     | 25       | 0.27          | 0.08         | 0.13    | rs56305048 |           |
|                     | 61458015 | intronic | C     | T     |          | 0.08          | 0.00         | 0.49    | rs56148915 |           |
|                     | 61458016 | intronic | G     | A     | 25       | 0.21          | 0.08         | 0.42    | rs56019702 |           |
|                     | 61458019 | intronic | A     | G     |          | <0.01         | <0.01        | -       | rs55683444 |           |
|                     | 61458266 | intronic | C     | T     | 25       | 0.41          | 0.46         | 0.81    | rs2273502  | +         |
|                     | 61461175 | intronic | G     | T     |          | 0.04          | 0.04         | 0.77    | rs45539234 |           |
|                     | 61461318 | intronic | C     | T     | 27       | 0.04          | 0.04         | 1.00    | rs6090384  |           |
|                     | 61461322 | intronic | C     | T     | 25       | 0.09          | 0.06         | 0.26    | rs2273505  |           |
|                     | 61461383 | synon    | G     | A     | 25       | 0.09          | 0.06         | 0.26    | rs2273506  |           |
|                     | 61461585 | intronic | G     | A     | 29       | 0.21          | 0.18         | 0.65    | rs3818204  | +         |
|                     | 61461665 | intronic | G     | C     |          | 0.17          | 0.17         | 1.00    | rs13044665 |           |
