# Supplementary material for: A Candidate Gene Approach Identifies the CHRNA5-A3-B4 Region as a Risk Factor for Age-Dependent Nicotine Addiction
Source: PubMed Central journal article supplement (PMC2442220; doi:10.1371/journal.pgen.1000125), 2008-07-11
Supplement: pgen.1000125.s004.pdf [file pgen.1000125.s004.pdf]

**Table S4.** Results of logistic regression analyses in which Haplotype C was the reference condition and two alternative criteria for low and high nicotine dependence were used (0-4 vs. 5-10 and 0-5 vs. 6-10).

| FTND<br>Split   | Hap            | Interaction |                     | Early Onset <sup>1</sup> |                     | Late Onset <sup>2</sup> |                     |
|-----------------|----------------|-------------|---------------------|--------------------------|---------------------|-------------------------|---------------------|
|                 |                | <i>P</i>    | OR                  | <i>P</i>                 | OR                  | <i>P</i>                | OR                  |
| 0-4 vs.<br>5-10 | H <sub>A</sub> | 0.03        | 1.54<br>(1.06-2.25) | 0.0001                   | 1.77<br>(1.32-2.38) | 0.26                    | 1.15<br>(0.90-1.46) |
|                 | H <sub>B</sub> | 0.32        | 1.21<br>(0.83-1.75) | 0.08                     | 1.29<br>(0.97-1.71) | 0.59                    | 1.07<br>(0.84-1.36) |
| 0-5 vs.<br>6-10 | H <sub>A</sub> | 0.04        | 1.43<br>(1.02-2.01) | 0.00009                  | 1.65<br>(1.28-2.12) | 0.22                    | 1.16<br>(0.92-1.45) |
|                 | H <sub>B</sub> | 0.10        | 1.33<br>(0.95-1.87) | 0.04                     | 1.31<br>(1.02-1.68) | 0.91                    | 1.01<br>(0.81-1.28) |

“Hap” = haplotype, “Interaction” = interaction between haplotype and early vs. late onset of daily smoking, “OR” = odds ratio (95% confidence intervals in parentheses).

<sup>1</sup> “Early Onset” = age of onset of daily smoking by 16.

<sup>2</sup> “Late Onset” = age of onset of daily smoking after 16.
