# Supplementary material for: A Candidate Gene Approach Identifies the CHRNA5-A3-B4 Region as a Risk Factor for Age-Dependent Nicotine Addiction
Source: PubMed Central journal article supplement (PMC2442220; doi:10.1371/journal.pgen.1000125), 2008-07-11
Supplement: pgen.1000125.s006.pdf [file pgen.1000125.s006.pdf]

**Table S6.** Frequency of Haplotypes A, B and C in 2,827 subjects from the UT-WI-LHS cohorts according to individual FTND items.

| FTND Item                                                                                                   | Early Onset <sup>1</sup><br>Haplotype Frequency |       |       | Late Onset <sup>2</sup><br>Haplotype Frequency |      |       |       |       |
|-------------------------------------------------------------------------------------------------------------|-------------------------------------------------|-------|-------|------------------------------------------------|------|-------|-------|-------|
|                                                                                                             | n                                               | A     | B     | C                                              | n    | A     | B     | C     |
| <b>1. How soon after you wake up do you smoke your first cigarette? (max. 3)</b>                            |                                                 |       |       |                                                |      |       |       |       |
| > 60 min (0)                                                                                                | 60                                              | 0.342 | 0.342 | 0.233                                          | 125  | 0.364 | 0.400 | 0.200 |
| 31-60 min (1)                                                                                               | 131                                             | 0.324 | 0.378 | 0.237                                          | 225  | 0.360 | 0.413 | 0.180 |
| 6-30 min (2)                                                                                                | 482                                             | 0.404 | 0.346 | 0.193                                          | 626  | 0.412 | 0.350 | 0.194 |
| < 6 min (3)                                                                                                 | 614                                             | 0.384 | 0.374 | 0.191                                          | 564  | 0.402 | 0.383 | 0.181 |
| <b>2. Do you find it difficult to refrain from smoking in places where it is forbidden?</b>                 |                                                 |       |       |                                                |      |       |       |       |
| Yes (1)                                                                                                     | 336                                             | 0.379 | 0.371 | 0.204                                          | 308  | 0.390 | 0.394 | 0.187 |
| No (0)                                                                                                      | 951                                             | 0.385 | 0.360 | 0.197                                          | 1232 | 0.399 | 0.371 | 0.188 |
| <b>3. Which cigarette would you hate most to give up, first one in the morning?</b>                         |                                                 |       |       |                                                |      |       |       |       |
| First (1)                                                                                                   | 714                                             | 0.398 | 0.350 | 0.200                                          | 826  | 0.402 | 0.374 | 0.185 |
| Any other (0)                                                                                               | 573                                             | 0.366 | 0.378 | 0.197                                          | 714  | 0.391 | 0.377 | 0.190 |
| <b>4. How many cigarettes per day did/do you smoke?</b>                                                     |                                                 |       |       |                                                |      |       |       |       |
| < 11 (0)                                                                                                    | 71                                              | 0.303 | 0.380 | 0.275                                          | 146  | 0.387 | 0.387 | 0.182 |
| 11-20 (1)                                                                                                   | 378                                             | 0.360 | 0.365 | 0.216                                          | 537  | 0.369 | 0.392 | 0.203 |
| 21-30 (2)                                                                                                   | 407                                             | 0.369 | 0.377 | 0.203                                          | 404  | 0.408 | 0.374 | 0.173 |
| >30 (3)                                                                                                     | 431                                             | 0.433 | 0.343 | 0.167                                          | 453  | 0.423 | 0.353 | 0.184 |
| <b>5. Do you smoke more frequently during the first hours after waking than during the rest of the day?</b> |                                                 |       |       |                                                |      |       |       |       |
| Yes (1)                                                                                                     | 471                                             | 0.403 | 0.365 | 0.183                                          | 499  | 0.408 | 0.372 | 0.187 |
| No (0)                                                                                                      | 509                                             | 0.366 | 0.369 | 0.213                                          | 656  | 0.387 | 0.380 | 0.190 |
| <b>6. Do you smoke if you are so ill that you are in bed most of the day?</b>                               |                                                 |       |       |                                                |      |       |       |       |
| Yes (1)                                                                                                     | 770                                             | 0.401 | 0.359 | 0.192                                          | 724  | 0.403 | 0.368 | 0.189 |
| No (0)                                                                                                      | 517                                             | 0.359 | 0.368 | 0.209                                          | 816  | 0.391 | 0.382 | 0.187 |

The haplotype-tagging SNPs are rs680244, rs569207, rs16969968, rs578776, and rs1051730, and tag sequences are from the chr. 15 (+) strand; Haplotype A tag = CCAGA, Haplotype B tag = TCGGG, Haplotype C tag = CTGAG. 'n' = number of subjects responding to questionnaire item.

<sup>1</sup> "Early Onset" = age of onset of daily smoking by 16.

<sup>2</sup> "Late Onset" = age of onset of daily smoking after 16.
