# Supplementary material for: A Candidate Gene Approach Identifies the CHRNA5-A3-B4 Region as a Risk Factor for Age-Dependent Nicotine Addiction
Source: PubMed Central journal article supplement (PMC2442220; doi:10.1371/journal.pgen.1000125), 2008-07-11
Supplement: pgen.1000125.s007.pdf [file pgen.1000125.s007.pdf]

**Table S7.** rs1051730 genotype and FTND item 4 comparison between combined early and late onset UT-WI-LHS smokers versus Icelandic smokers.

| Study                          | FTND Item 4                   | Genotype of rs1051730 |         |         | Total n<br>(frequency) | Frequency<br>of T allele |
|--------------------------------|-------------------------------|-----------------------|---------|---------|------------------------|--------------------------|
|                                |                               | CC                    | CT      | TT      |                        |                          |
| UT-WI-LHS <sup>a</sup>         |                               |                       |         |         |                        |                          |
|                                | Cigarettes per day (SQ level) |                       |         |         |                        |                          |
|                                | 1 to 10 (0)                   | 94                    | 90      | 33      | 217 (0.077)            | 0.359                    |
|                                | 11 to 20 (1)                  | 362                   | 438     | 115     | 915 (0.324)            | 0.365                    |
|                                | 21 to 30 (2)                  | 309                   | 374     | 128     | 811 (0.287)            | 0.388                    |
|                                | 31 and more (3)               | 288                   | 436     | 160     | 884 (0.313)            | 0.428                    |
|                                | All levels                    | 1,053                 | 1,338   | 436     | 2,827 (1.000)          |                          |
|                                | (frequency)                   | (0.372)               | (0.473) | (0.154) |                        | 0.391                    |
|                                | Mean SQ level                 | 1.75                  | 1.86    | 1.95    |                        |                          |
| Icelandic Smokers <sup>b</sup> |                               |                       |         |         |                        |                          |
|                                | Cigarettes per day (SQ level) |                       |         |         |                        |                          |
|                                | 1 to 10 (0)                   | 1,743                 | 1,558   | 326     | 3,627 (0.260)          | 0.305                    |
|                                | 11 to 20 (1)                  | 2,727                 | 2,865   | 810     | 6,402 (0.459)          | 0.350                    |
|                                | 21 to 30 (2)                  | 1,145                 | 1,416   | 427     | 2,988 (0.214)          | 0.380                    |
|                                | 31 and more (3)               | 341                   | 448     | 139     | 928 (0.067)            | 0.391                    |
|                                | All levels                    | 5,956                 | 6,287   | 1,702   | 13,945 (1.000)         |                          |
|                                | (frequency)                   | (0.427)               | (0.451) | (0.122) |                        | 0.347                    |
|                                | Mean SQ level                 | 1.01                  | 1.12    | 1.22    |                        |                          |

<sup>a</sup> data from this study, early and late onset combined, rs1051730 allele T is equivalent to Haplotype A in this population

<sup>b</sup> data from Table 1, Thorgeirsson et al., Nature April 2008, 452: 638-641., GG and GT genotypes from that table have been recoded to CC and CT to be consistent with our data and the NCBI Reference SNP Cluster Report for rs1051730.
